# Supplementary material for: Defining the next generation of Plasmodium vivax diagnostic tests for control and elimination: Target product profiles
Source: PubMed Central journal article supplement (PMC5391123; doi:10.1371/journal.pntd.0005516), 2017-04-03
Supplement: pntd.0005516.s001.pdf [file pntd.0005516.s001.pdf]

## S1 Table. Summary of existing malaria diagnostic TPPs

Four TPPs for malaria diagnostics have been made publicly available from various organizations over the past 5 years. Two TPPs, for case management and screening and surveillance were published by the The Malaria Eradication Research Agenda (malERA) initiative [1]. Preferred characteristics for new technologies are presented in the meeting report of WHO Evidence Review Group on Malaria Diagnosis in Low Transmission Settings [2]. Finally PATH published a draft TPP for active case detection of sub-patent and asymptomatic malaria infections within the frame of the DIAMETER project [3]. The malERA and WHO TPPs are relevant for both *P. falciparum* and *P. vivax* while the PATH DIAMETER TPP is specifically designed for *P. falciparum*.

In addition to these four TPPs, recommendations for new *P. vivax* diagnostics are briefly discussed in the recently released WHO technical brief on the Control and Elimination of *Plasmodium Vivax* Malaria [4]. These are for diagnostic methods that more readily detect parasites in a clinical setting with a sensitivity of 25 p/μL for blood stage *P. vivax* infections as well as diagnostic methods that can detect hypnozoite (liver stage *P. vivax* infections).

|                               | malERA: Diagnoses and Diagnostics<br>(January 2011) [1]                                                           |                                                                                                                                                                                               | MPAC Session 10<br>(March 2014) [2]                              | DIAMETER<br>Project<br>(March 2014) [3]                                                                                                        |
|-------------------------------|-------------------------------------------------------------------------------------------------------------------|-----------------------------------------------------------------------------------------------------------------------------------------------------------------------------------------------|------------------------------------------------------------------|------------------------------------------------------------------------------------------------------------------------------------------------|
| <b>Intended use</b>           | Case Management in Elimination Settings                                                                           | Screening/Surveillance (District Level or Below)                                                                                                                                              | Detection of parasites in low transmission settings              | « Active infection detection interventions aimed at low-density and subclinical infection detection. »                                         |
| <b>Target analyte</b>         | <i>n/a</i>                                                                                                        | <i>n/a</i>                                                                                                                                                                                    | <i>n/a</i>                                                       | M <sup>a</sup> : HRP2<br>O <sup>a</sup> : HRP2, one other <i>P. falciparum</i> specific antigen, plus a Pan or <i>Plasmodium vivax</i> antigen |
| <b>Analytical sensitivity</b> | M: ≤ 200 p/μL<br>O: < 5 p/μL                                                                                      | M ≤ 20 p/μL<br>O: ≤ 5 p/μL                                                                                                                                                                    | ≤ 2 p/μL                                                         | M: ≤ 10 p/μL<br>O: ≤ 5 p/μL                                                                                                                    |
| <b>Analytical specificity</b> | M: <i>P. falciparum</i><br>O: <i>P. falciparum</i> / Pan<br>Negative for all pathogens and common blood disorders | M: <i>P. falciparum</i><br>O: Discriminate all human infection <i>Plasmodium</i> spp., identify hypnozoite and optionally gametocyte<br>Negative for all pathogens and common blood disorders | Detection at genus level with subsequent species differentiation | M: <i>P. falciparum</i><br>O: <i>P. falciparum</i> / <i>P. vivax</i> / <i>Plasmodium spp.</i>                                                  |

|                                        | <b>malERA: Diagnoses and Diagnostics<br/>(January 2011) [1]</b>                                       |                                                                                           | <b>MPAC Session 10<br/>(March 2014) [2]</b>                                                                           | <b>DIAMETER<br/>Project<br/>(March 2014) [3]</b>                                                                                           |
|----------------------------------------|-------------------------------------------------------------------------------------------------------|-------------------------------------------------------------------------------------------|-----------------------------------------------------------------------------------------------------------------------|--------------------------------------------------------------------------------------------------------------------------------------------|
| <b>Diagnostic sensitivity</b>          | M: > 95%<br>O: ≥ 99%                                                                                  | M: > 95%<br>O: ≥ 99%                                                                      | ≥ 95% for<br><i>Plasmodium</i> genus                                                                                  | M: ≥ 97%<br>O: ≥ 99%                                                                                                                       |
| <b>Diagnostic specificity</b>          | M: > 90%<br>O: > 95%                                                                                  | M: > 95%<br>O: > 99%                                                                      | <i>n/a</i>                                                                                                            | M: ≥ 90%<br>O: ≥ 99%                                                                                                                       |
| <b>Repeatability (inter-operators)</b> | Kappa > 0.9                                                                                           | Kappa > 0.9                                                                               | <i>n/a</i>                                                                                                            | <i>n/a</i>                                                                                                                                 |
| <b>Operating conditions</b>            | <i>n/a</i>                                                                                            | <i>n/a</i>                                                                                | <i>n/a</i>                                                                                                            | M: 20 to 35°C<br>O: 10 to 40°C                                                                                                             |
| <b>Sample type and volume</b>          | M: capillary blood from finger prick<br>O: non-invasive                                               | M: capillary blood from finger prick<br>O: non-invasive                                   | ≤ 50 µL of blood                                                                                                      | M: ≤ 50 µL of capillary blood from finger prick<br>O: ≤ 25 µL of less invasive sample                                                      |
| <b>Assay throughput</b>                | <i>n/a</i>                                                                                            | <i>n/a</i>                                                                                | 48 samples / person / platform / day                                                                                  | M: 7 samples / person / platform / hour<br>O: >10 samples / person / platform / hour                                                       |
| <b>Time-to-result</b>                  | M: > 30 minutes<br>O: > 15 minutes                                                                    | M: > 2 days<br>O: > half-day                                                              | M: > 24 hours<br>O: > 16 hours                                                                                        | M: > 30 minutes<br>O: > 15 minutes                                                                                                         |
| <b>Assay format</b>                    | Usable at community level<br>Simple, few steps                                                        | Usable by medical technician                                                              | Automated end-point format, instrument independent<br>Objective reading, easy to interpret<br>Minimum number of steps | Lateral-flow immunochromatographic strip in cassette format.<br>High-contrast, clear results for naked-eye<br>Two (M) or no (O) timed step |
| <b>Packaging</b>                       | Individual, moisture-proof, with all required consumable included and temperature violation detection | Moisture-proof, with all required consumable included and temperature violation detection | <i>n/a</i>                                                                                                            | O: temperature violation detection                                                                                                         |
| <b>Reagents</b>                        | All necessary reagent provided                                                                        | All necessary reagent provided                                                            | <i>n/a</i>                                                                                                            | All necessary reagent provided                                                                                                             |
| <b>Equipment</b>                       | All necessary equipment provided                                                                      | <i>n/a</i>                                                                                | Portable                                                                                                              | Highly portable<br>Battery-powered reader if required<br>No water need                                                                     |
| <b>Power requirement</b>               | No external power source                                                                              | <i>n/a</i>                                                                                | <i>n/a</i>                                                                                                            | No external power source                                                                                                                   |

|                                        | <b>malERA: Diagnoses and Diagnostics<br/>(January 2011) [1]</b>                                                                                                  |                                                                                                                            | <b>MPAC Session 10<br/>(March 2014) [2]</b>                                                                          | <b>DIAMETER<br/>Project<br/>(March 2014) [3]</b>                                                                       |
|----------------------------------------|------------------------------------------------------------------------------------------------------------------------------------------------------------------|----------------------------------------------------------------------------------------------------------------------------|----------------------------------------------------------------------------------------------------------------------|------------------------------------------------------------------------------------------------------------------------|
| <b>Transport and storage stability</b> | M: stable at > 35°C for 2 years (incl. 18 months in country)<br>O: stable at > 45°C for 36 months                                                                | M: stable at ≤ 30°C for 1 year (incl. 6 months in country)<br>O: stable at ≤ 30°C for 2 years (incl. short period at 45°C) | No transport required below 4°C<br>Stable at 4°C for > 1 year, at RT for > 6 months                                  | M: stable at 2 - 30 °C for 18 months (+ 2 weeks at 40 °C)<br>O: stable at 2 - 40 °C for 36 months (+ 2 weeks at 50 °C) |
| <b>Control</b>                         | <i>n/a</i>                                                                                                                                                       | <i>n/a</i>                                                                                                                 | <i>n/a</i>                                                                                                           | Internal control line<br>Compatible with positive control well                                                         |
| <b>Connectivity</b>                    | <i>n/a</i>                                                                                                                                                       | <i>n/a</i>                                                                                                                 | Desirable network connectivity for data transfer                                                                     | O: Cloud-based, real-time data handling                                                                                |
| <b>Training</b>                        | Half day for community health worker                                                                                                                             | ≤ 1 week for pretrained medical technician                                                                                 | ≤ 1 week                                                                                                             | M: < 1 day<br>O: < half-day                                                                                            |
| <b>Biosafety</b>                       | High blood safety<br>Non-toxic reagents                                                                                                                          | High blood safety<br>Non-toxic reagents                                                                                    | Low contamination risk<br>No hazardous waste                                                                         | High blood safety<br>No hazardous waste                                                                                |
| <b>Cost</b>                            | ≤ 1 USD / test                                                                                                                                                   | ≤ 1 USD / test                                                                                                             | Affordable                                                                                                           | M: ≤ 2 USD / test, no capital cost except for reader<br>O: ≤ 1 USD / test, no capital cost                             |
| <b>Comments</b>                        | “The sensitivity required for <i>P. vivax</i> is generally at least that required for <i>P. falciparum</i> , and the parameters here should be applied to both.” |                                                                                                                            | Analytical sensitivity setting based on one log improvement over expert microscopy to be a "significant improvement" |                                                                                                                        |

<sup>a</sup>M: minimal, O: optimal

## Supplementary References

1. The malERA Consultative Group on Diagnoses and Diagnostics. A Research Agenda for Malaria Eradication: Diagnoses and Diagnostics. *PLoS Med.* 2011;8: e1000396. doi:10.1371/journal.pmed.1000396.t001
2. World Health Organization. WHO Evidence Review Group on Malaria Diagnosis in Low Transmission Settings [Internet]. 21 Mar 2014 [cited 11 Oct 2015] pp. 1–33. Available: [http://www.who.int/malaria/mpac/mpac\\_mar2014\\_diagnosis\\_low\\_transmission\\_settings\\_report.pdf](http://www.who.int/malaria/mpac/mpac_mar2014_diagnosis_low_transmission_settings_report.pdf)
3. PATH. Target Product Profile: Point-of-Care Malaria Infection Detection Test. In: [sites.path.org](http://sites.path.org) [Internet]. [cited 25 Jun 2016]. Available: [http://sites.path.org/dx/files/2012/11/DIAMETER\\_IDT\\_TPP\\_FINAL\\_forwebsite.pdf](http://sites.path.org/dx/files/2012/11/DIAMETER_IDT_TPP_FINAL_forwebsite.pdf)
4. World Health Organization. Control and Elimination of Plasmodium Vivax Malaria. 2015.
